# Supplementary material
Source: Springer Nature journal article supplement (https://www.springermedizin.de/resource/supplementary/13058_2010_9479_MOESM3_ESM.pdf/9702240)

## A) Immunohistochemistry

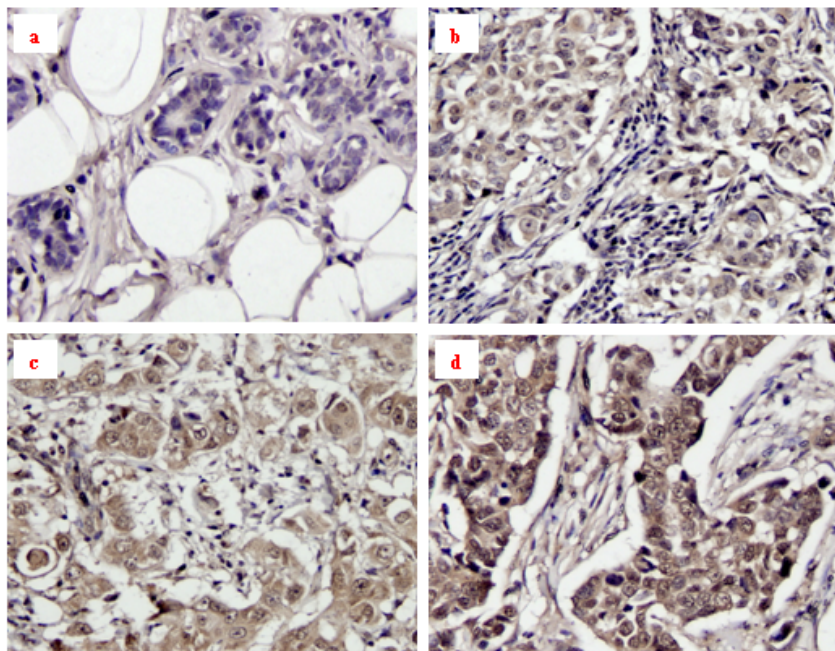

## B) Patient survival

### i) Overall survival

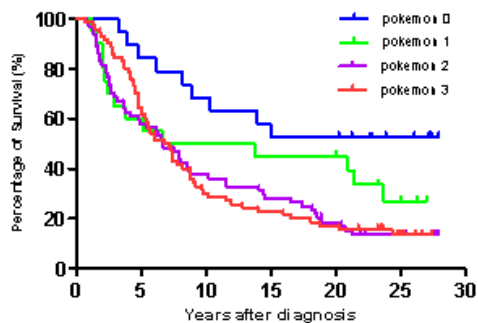

### ii) Disease-related survival

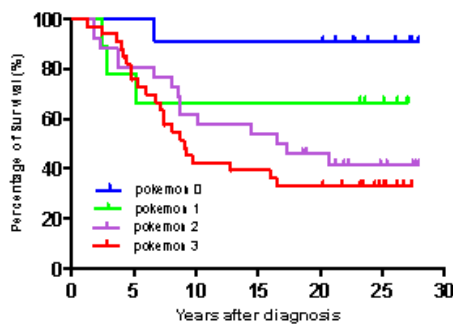

Supplement: MOESM3 [file 9702240]
